# Supplementary material for: A multi-component coupling approach to benzo[b]furans and indoles
Source: Royal Society of Chemistry journal article supplement (doi:10.1039/b104624c), 2001-01-01
Supplement: b104624c.doc [file b104624c.doc]

# Electronic Supporting Information

# A Multi-Component Coupling Approach to Benzo[*b*]furans and Indoles.

Jason H. Chaplin and Bernard L. Flynn.*

*Department of Chemistry, The Faculties, Australian National University, Canberra, ACT, 0200, Australia.*

**General methods:**

Melting points were recorded with a Kofler hot-stage apparatus and are uncorrected. Proton (1H) and (13C) NMR spectra were recorded with a Varian Gemini 300 spectrometer operating at 300 MHz for proton and 75 MHz for carbon. All NMR spectra were recorded in (D)chloroform (CDCl3) at 20 °C. The protonicities of the carbon atoms observed in the carbon NMR were determined using attached proton test (APT) experiments. Infrared spectra (IR) were obtained as KBr discs or as films on NaCl plates and were recorded on a Perkin-Elmer *Spectrum One* Fourier-transform infrared spectrophotometer. Low-resolution electron impact mass spectra (MS) were recorded at 70 eV on either a VG micromass 7070F instrument or a JEOL AX-505H mass spectrometer. High-resolution mass spectra (HRMS) were recorded on a VG micromass 7070F instrument. Tetrahydrofuran (THF) was distilled under nitrogen from sodium benzophenone ketyl. Dimethylsulfoxide (DMSO) was distilled from calcium hydride under reduced pressure. All experiments were performed under an anhydrous atmosphere of N2 (g). Flash chromatography was performed on Merk Kieselgel 60.

**3-(2-allyl-1-oxo-cyclohexen-3-yl)-2-phenylbenzo[*b*]furan (14a)**

Methylmagnesium chloride (0.70 mL, 3.0 M in THF, 2.10 mmol) was added dropwise to a solution of *o*-iodophenol **10a** (220 mg, 1.00 mmol) and phenylacetylene **4a** (120 L, 1.10 mmol) in dry THF (2.5 mL) at 0 oC. The reaction mixture was then warmed to 18 oC, Pd(PPh3)2Cl2 (21 mg, 0.030 mmol) added and the reaction mixture heated to 65 oC for 1.2 h, after which time the reaction was shown to be complete by TLC. The solution was cooled to 18 oC, diluted with DMSO (2.5 mL) and 2-allyl-3-bromocyclohexenone **13a** (218 mg, 1.01 mmol) added. The solution was heated to 80 oC (external temperature) under a slight flow of N2 (g) for 1 h (to remove THF) and heating continued under a stationary atmosphere of N2 (g)for a further 13 h. The reaction mixture was cooled to 18 oC diluted with diethyl ether (40 mL) and washed with water (2 x 40 mL), dried over MgSO4 and concentrated onto silica-gel (2 g) under reduced pressure. The solid residue was subjected to flash chromatography (silica-gel, eluted sequentially with hexane / diethyl ether 9:1 and 5:1). The relevant fractions (R*f* = 0.15, hexane / diethyl ether 5:1) were concentrated giving the product **14a** as a clear oil, which crystallised upon standing (256 mg, 78%), mp = 79-80 oC. 1H NMR (300 MHz, CDCl3)  7.80 (dd, *J* = 1.5 Hz, 8.4 Hz, 2H), 7.56 (dd, *J* = 1.2 Hz, 6.3 Hz, 1H), 7.20-7.48 (m, 6H), 5.66 (mc, 1H), 4.67 – 4.78 (m, 2H), 3.11 (dd, *J* = 6.3 Hz, 14.1 Hz, 1H), 2.94 (dd, *J* = 6.9 Hz, 14.1 Hz, 1H), 2.52-2.73 (m, 4H), 2.16 (quintet, *J* = 6.3 Hz, 2H). 13C NMR + APT (75 MHz, CDCl3)  198.2 (C), 154.0 (C),149.7 (C), 138.0 (C), 135.2 (CH), 130.2 (C), 128.8 (CH), 128.1 (C), 126.1 (CH), 125.0 (CH), 123.1 (CH), 119.7 (CH), 116.0 (C), 115.6 (CH2), 111.3 (CH), 38.1 (CH2), 31.6 (2 x CH2), 23.0 (CH2) (two non-equivalent quaternary carbons appear to be superimposed upon each other). IR (KBr disc, cm-1) 3074, 2946, 2859, 1663, 1623, 1454, 1442, 1429, 1377, 1342, 1257, 1206, 1162, 1117. MS (70 eV) *m/z* (%): 328 (, 100), 313 (30), 300 (25), 287 (21), 272 (16), 257 (23), 231 (29), 218 (19), 202 (24), 165 (17). HRMS calcd for C23H20O2 328.1463. Found: 328.1461.

**2-(Benzo[1,3]dioxol-5-yl)-6-methoxy-3-[**-(*E*)*-*styrenyl]benzo[*b*]furan (14b):**

Methylmagnesium chloride (1.5 M solution in THF, 1.15 mL, 1.73 mmol) was added dropwise by syringe to a solution of 2-iodo-5-methoxyphenol **10b** (200 mg, 0.800 mmol) and 5-ethynylbenzo[1,3]dioxole **4b** (140 mg, 0.958 mmol) in dry THF (3 mL) at 0 C. After warming to room temperature, Pd(PPh3)2Cl2 (17 mg, 3 mol%) was added and the reaction heated to 65 C and monitored by TLC. After 2.5 h consumption of **10b** was complete (R*f* = 0.37, 40% ether in hexane). The solution was cooled to 18 oCand the reaction mixture diluted with DMSO (5 mL). -(*E*)-Iododostyrene **13b** (221 mg, 0.961 mmol) was then added and the reaction was heated to 95 C (external temperature) under a slight flow of N2 (g) for 1 h (to remove THF) and under a stationary atmosphere of N2 (g) for a further 2 h. TLC analysis revealed complete consumption of the tolan intermediate **12** (R*f*  = 0.40, hexane / CH2Cl2 1:1) and the reaction was extracted with CH2Cl2 (50 mL)and washed with 10% NH4Cl (50 mL) and water (50 mL). The organic layer was dried over MgSO4 and evaporated onto silica-gel (2.0 g). The solid residue was subjected to flash chromatography (silica-gel, eluted sequentially with hexane / CH2Cl2 2:1 and 1:1). Concentration of the relevant fractions (R*f* = 0.74, hexane / CH2Cl2 1:1) followed by recrystallisation from CH2Cl2 / hexane gave the product **14b** (133 mg, 45%) as a white solid mp = 116-8C. 1H-NMR (300 MHz, CDCl3)  7.82 (d, *J =* 8.9 Hz, 1H), 7.54 (m, 2H), 7.40 (mc, 2H), 7.25 – 7.45 (m, 5H), 7.08 (d, *J =* 2.1 Hz, 1H), 6.96 (m, 2H), 6.06 (s, 2H), 3.91 (s, 3H). 13C NMR (75 MHz, CDCl3)  158.2 (C), 155.3 (C), 152.6 (C), 148.1 (C), 148.0 (C), 137.9 (C), 130.5 (CH), 128.8 (CH) 127.5 (CH), 126.3 (CH), 125.0 (C), 122.2 (CH), 121.2 (C), 121.1 (CH), 120.1 (CH), 113.7 (C), 111.9 (CH), 108.8 (CH), 107.9 (CH), 101.4 (CH), 96.0 (C), 55.8 (CH3). IR (NaCl film, cm-1): 1626, 1485, 1441, 1295, 1240, 1196, 1153, 1104, 1040, 811, 695. MS *m/z* (%): 370 (M+, 100), 355 (20). HRMS calcd C24H18O4: 370.1205. Found: 370.1205.

**6-Methoxy-2-(4-methoxyphenyl)-3-(3,4,5-trimethoxyphenyl)benzo[*b*]furan (14c):**

Methylmagnesium chloride (2.0 mL, 3.0 M in THF, 6.0 mmol) was added dropwise to a solution of 2-iodo-5-methoxyphenol **10b** (711 mg, 2.85 mmol) and 4-ethynylanisole **4c** (413 mg, 3.13 mmol) in dry THF (5.0 mL) at 0 oC. The reaction mixture was then warmed to 18 oC, Pd(PPh3)2Cl2 (60 mg, 0.086 mmol) added and the reaction mixture heated to 65 oC for 1.5 h, after which time consumption of **10b** (R*f* = 0.6, hexane / diethyl ether 2:1) was shown to be complete by TLC. The solution was then cooled to 18 oC, diluted with DMSO (6.0 mL), 3,4,5-trimethoxyiodobenzene **13c** (920 mg, 3.13 mmol) added and the solution heated to 80 oC (external temperature) under a slight flow of N2 (g) for 1 h (to remove the THF) and under a stationary atmosphere of N­2 (g) for a further 4 h. The reaction mixture was cooled to 18 oC diluted with ethyl acetate (100 mL) and washed with water (2 x 80 mL) and brine (3 x 80 mL), dried over MgSO4 and concentrated onto silica-gel (3 g) under reduced pressure. The solid residue was subjected to flash chromatography (silica-gel, eluted sequentially with hexane / CH2Cl2 2:1, 1:1, 1:2) giving the product **14c** as a white solid (1.05 g, 88%) mp =146-7 oC. 1H NMR (300 MHz, CDCl3)  7.62 (d, *J* = 9.0 Hz, 2H), 7.40 (d, *J* = 8.4 Hz, 1H), 7.09 (d, *J* = 2.4 Hz, 1H), 6.89 (dd, *J* = 2.4 Hz, 8.4 Hz, 1H), 6.87 (d, *J* = 9.0 Hz, 2H), 6.73 (s, 2H), 3.96 (s, 3H), 3.88 (s, 3H), 3.81 (s, 6H). 13C NMR + APT (75 MHz, CDCl3)  159.3 (C), 158.0 (C), 154.6 (C), 153.5 (C), 149.6 (C), 137.2 (C), 128.5 (C), 127.9 (CH), 123.6 (C), 123.3 (C), 119.8 (CH), 115.7 (C), 113.7 (CH), 111.6 (CH), 106.4 (CH), 95.6 (CH), 60.9 (CH3), 56.0 (2x CH3), 55.7 (CH3), 55.2 (CH3). IR (KBr disc, cm-1) 2995, 2966, 2938, 2837, 1606, 1580, 1493, 1442, 1412, 1383, 1318, 1281, 1255, 1235, 1195, 1183, 1151, 1131 1067, 1030, 1019. MS (70 eV) *m/z* (%): 420 (, 100), 405 (CH3, 15). HRMS calcd for C25H24O6: 420.1573. Found: 420.1569

**2-(Benzo[1,3]dioxol-5-yl)-4,6-dimethoxy-3-(3,4,5-trimethoxyphenyl)benzo[*b*]furan (14d):**

Methylmagnesium chloride (1.6 M in THF, 0.96 mL, 1.54 mmol) was added dropwise by syringe to a solution of 3,5-dimethoxy-2-iodophenol **10c** (200mg, 0.714 mmol) and 5-ethynylbenzo[1,3]dioxole **4b** (125 mg, 0.855 mmol) in dry THF (3 mL), stirred under nitrogen at 0 C. After warming to room temperature, Pd(PPh3)2Cl2 (15 mg, 3 mol%) was added and the reaction heated to 65 C and monitored by TLC. The solution was cooled to 18 oCand the reaction mixture diluted with DMSO (5 mL). 3,4,5-Trimethoxyiodobenzene **13c** (252 mg, 0.857 mmol) was then added and the reaction heated to 95 C under a slight flow of N2 (g) for 1 h (to remove THF) and under a stationary atmosphere of N2 (g) for a further 2 h. After this time complete consumption of the intermediate tolan **12** was observed by TLC (Rf = 0.31, 40% ether in hexane). The reaction was diluted with CH2Cl2 (50 mL) and washed with 10% NH4Cl (aq) (50 mL) and water (50 mL). The organic layer was dried over MgSO­4 and the crude reaction mixture evaporated onto silica-gel (1.5 g). The solid residue was subjected to flash chromatography (silica-gel, sequential elution with hexane / CH2Cl2 1:1, hexane / CH2Cl2 / diethyl ether 20:20:1, 10:10:1 and 5:5:1) the relevant fractions (R*f* = 0.53, CH2Cl2 / hexane / diethyl ether 10:10:1) were evaporated to give the product **14d** (267 mg, 81%) as a white solid, mp = 148-52C. 1H-NMR (300, CDCl3)  7.05 (d, *J =* 8.3 Hz, 1H), 7.02 (s, 1H), 6.74 (d, *J =* 8.3 Hz, 1H), 6.71 (s, 2H), 6.70 (d, *J =* 1.8 Hz, 1H), 6.32 (d, *J =* 1.8 Hz, 1H), 5.96 (s, 2H), 3.95 (s, 3H), 3.88 (s, 3H), 3.80 (s, 6H), 3.73 (s, 3H). 13C-NMR (CDCl3)  159.1 (C), 155.6 (C), 154.6 (C), 152.8 (C), 148.5 (C), 147.5 (C), 147.2 (C), 137.2 (C), 128.9 (C), 125.0 (C), 121.0 (CH), 116.2 (C), 112.8 (C), 108.3, (CH), 107.9 (CH), 107.2 (CH), 101.1 (CH2), 94.6 (CH), 88.0 (CH), 61.1 (CH3), 56.2 (CH3), 55.8 (CH3), 55.4 (CH3). IR (NaCl film, cm-1): 3054, 2987, 1602, 1504, 1489, 1454, 1421, 1264, 1217, 1200, 1153, 1129, 1041, 896, 746, 728, 708. MS *m/z* (%): 464 (M+, 100), 449 (M+ - CH3, 18), 418 (12). HRMS calcd C26H24O8:464.1471. Found: 464.1470.

**17-*O*-Benzyl-[2-(1,3-benzodioxol-5-yl)-3-(3,4,5-trimethoxyphenyl)furano[2,3-*b*]-1,3,5(10)-estratrien-17**-ol (14e):**

Methylmagnesium chloride (0.43 mL, 2.8 M in THF, 1.2 mmol) was added dropwise by syringe to a solution of 2-iodo-17-*O-*benzylestradiol **10d** (270 mg, 0.55 mmol) and 5-ethynyl-1,3-benzodioxole **4b** (104 mg, 0.71 mmol) in dry THF (4 mL) at 0 C. After warming to room temperature Pd(PPh3)Cl2 (19 mg, 5 mol%) was added and the reaction heated to 65 C. After stirring for 4 h complete consumption of **10d** was observed by TLC (R*f* = 0.43, 35% diethyl ether in hexane). The solution was cooled to 18 oC, DMSO (5 mL) and 3,4,5-trimethoxyiodobenzene **13c** (211 mg, 0.72 mmol) were added. The reaction mixture was then heated to 95 C (external temperature) under a slight flow of N2 (g) (to remove THF) for 1 h and under a stationary atmosphere of N2 (g) for a further 2 h. Consumption of the intermediate tolan (R*f* = 0.38, 35% diethyl ether in hexane) was observed by TLC and the reaction was diluted with CH2Cl2 (50 mL) and washed with 10% NH4Cl(aq) (50 mL) and water (50 mL). The organic layer was dried over MgSO4 and the crude mixture evaporated onto silica-gel (2 g). The solid residue was subjected to flash chromatography (silica-gel, eluted sequentially with CH2Cl2 and 1% diethyl ether in CH2Cl2) giving the product **14e** (Rf = 0.20, CH2Cl2) as a white solid (259 mg, 70%) mp = 160-3 oC. 1H-NMR (CDCl3)  7.40 (s, 1H), 7.30 – 7.37 (m, 5H), 7.25 (s, 1H), 7.21 (dd, *J =* 8.1 Hz and 1.8 Hz, 1H), 7.17 (d, *J =* 1.8 Hz, 1H), 6.78 (d, *J =* 8.1 Hz, 1H), 6.70 (s, 2H), 5.98 (s, 2H), 4.59 (s, 2H), 3.97 (s, 3H), 3.83 (s, 6H), 3.53 (t, *J =* 7.8 Hz, 1H), 3.02 (t, *J* = 3.9 Hz, 1H), 1.23 – 2.33 (m, 14H), 0.89 (s, 3H). 13C-NMR (300 MHz, CDCl3)  153.6 (C), 152.2 (C), 149.6 (C), 147.6(C), 147.5 (C), 139.2 (C), 137.3 (C), 135.8 (C), 134.2 (C), 128.5 (C), 128.2 (C), 127.2 (C), 124.8 (C), 121.1 (CH), 116.3 (C), 115.7 (C), 110.4 (C), 108.3 (C), 107.2 (C), 106.6 (C), 101.1 (CH2), 88.2 (CH), 71. (CH2), 61.0 (CH3), 56.2 (CH3), 50.4 (CH), 44.4 (CH), 43.4 (CH2), 38.7 (CH), 37.8 (CH2), 30.1 (CH2), 28.0 (CH2), 27.3 (CH2), 26.6 (CH2), 23.2 (CH2), 11.8 (CH3). IR (neat)  max = 2932, 1580, 1505, 1489, 1465, 1453, 1411, 1379, 1299, 1236, 1128, 1105, 1038, 736. LRMS *m/z* (%): 672 (M+, 100), 91 (26). HRMS Calcd C43H44O7 672.3087. Found: 672.3093.

**3-Allyl-2-propyl-benzo[*b*]furan (14f):**

Methylmagnesium chloride (1.59 mL, 3.0 M in THF, 4.77 mmol) was added dropwise to a solution of *o*-iodophenol **10a** (500 mg, 2.27 mmol) and 1-pentyne **4d** (300 L, 3.05 mmol) in dry THF (4.0 mL) at 0 oC. The reaction mixture was then warmed to 18 oC, Pd(PPh3)2Cl2 (48 mg, 0.068 mmol) added and the reaction mixture heated to 65 oC for 1.2 h, after which time the reaction was shown to be complete by TLC. The solution was cooled to 18 oC, diluted with DMSO (4.0 mL) and allylacetate **13d** (260 L, 2.40 mmol) added. The solution was heated to 80 oC (external temperature) for 2 h. The reaction mixture was cooled to 18 oC diluted with diethyl ether (100 mL) and washed with water (2 x 100 mL), dried over MgSO4 and concentrated onto silica-gel (2 g) under reduced pressure. The solid residue was subjected to flash chromatography (silica-gel, elution with hexane) giving the product **14f** as a clear oil (318 mg, 70 1H NMR (300 MHz, CDCl3)  7.52-7.68 (m, 2H), 7.31-7.40 (m, 2H), 6.12 (mc, 1H), 5.18 – 5.32 (m, 2H), 3.53 (dd, *J* = 1.5 Hz, 6.0 Hz, 1H), 2.87 (t, *J* = 7.3 Hz, 2H), 1.92 (sextet, *J* = 7.3 Hz, 2H), 1.14 (t, *J* = 7.3 Hz, 3H). 13C NMR + APT (75 MHz, CDCl3)  154.8 (C), 154.0 (C), 135.9 (CH), 129.6 (C), 123.0 (CH), 121.9 (CH), 119.1 (CH), 115.4 (CH­2), 111.8 (C), 110.6 (CH), 28.2 (CH2), 27.9 (CH2), 21.7 (CH2), 13.8 (CH3). IR (NaCl film, cm-1) 2961, 1639, 1455, 1258, 1222, 1172. MS (70 eV) *m/z* (%): 200 (, 100), 171 (CH2-CH3, 88), 128 (34). HRMS calcd for C14H16O: 200.1201. Found: 200.1203.

**2-Phenyl-3-(1,2-propadienyl)benzo[*b*]furan (14g):**

Methylmagnesium chloride (0.88 mL, 2.70 M in THF, 2.38 mmol) was added dropwise to a solution of *o*-iodophenol **10a** (250 mg, 1.13 mmol) and phenylacetylene **4a** (137 L, 1.25 mmol) in dry THF (2.5 mL) at 0 oC. The reaction mixture was then warmed to 18 oC, Pd(PPh3)2Cl2 (23 mg, 0.033 mmol) added and the reaction mixture heated to 65 oC for 1 h, after which time the reaction was shown to be complete by TLC. The solution was cooled to 18 oC, diluted with CH3CN (2.5 mL) and propargyltosylate **13e** (305 mg, 1.45 mmol) added and the solution heated to 80 oC (external temperature) for 2 h. After this time additional **13e** (305 mg, 1.45 mmol) was added and the reaction mixture heated for another 2 h. The reaction mixture was cooled to 18 oC diluted with water (50 mL) and extracted with hexane (2 x 50 mL), dried over MgSO4 and concentrated onto silica-gel (2 g) under reduced pressure. The solid residue was subjected to flash chromatography (silica-gel, elution with hexane) giving the product **14g** (R*f* = 0.5, hexane) as a clear oil (168 mg, 64%). 1H NMR (300 MHz, CDCl3)  8.04 (d, *J* = 6.3 Hz, 1H), 7.85 (d, *J* = 7.2 Hz, 2H), 7.25-7.60 (m, 6H), 6.68 (t, *J* = 7.2 Hz, 1H), 5.31 (d, *J* = 7.2 Hz, 2H). 13C NMR + APT (75 MHz, CDCl3)  211.8 (C), 154.3 (C), 151.5 (C), 130.7 (C), 128.8 (CH), 128.7 (CH), 128.4 (C), 127.7 (CH), 124.8 (CH), 122.8 (CH), 121.0 (CH), 111.1 (CH), 108.5 (C), 84.9 (CH), 78.7 (CH2). IR (NaCl film, cm-1) 3056, 2928, 1940, 1588, 1454, 1255, 1208, 1066, 1026. MS (70 eV) *m/z* (%): 232 (, 64), 231 (H, 75), 202 (25), 195 (30), 194 (100), 165 (63). HRMS calcd for C17H11O (H): 231.0810. Found: 231.0810.

**6-Methoxy-2-(4-methoxyphenyl)-3-(3,4,5-trimethoxybenzoyl)benzo[*b*]furan (15a):**

Methylmagnesium chloride (1.40 mL, 3.0 M in THF, 4.2 mmol) was added dropwise to a solution of 2-iodo-5-methoxyphenol **10b** (500 mg, 2.0 mmol) and 4-ethynylanisole **4c** (290 mg, 2.2 mmol) in dry THF (5.0 mL) at 0 oC. The reaction mixture was then warmed to 18 oC, Pd(PPh3)2Cl2 (42 mg, 0.06 mmol) added and the reaction mixture heated to 65 oC for 1 h, after which time the reaction was shown to be complete by TLC. The THF was removed under a flow of N2 (g). The residue was cooled to 18 oC, diluted with DMSO (8.0 mL) and the N2 (g) atmosphere exchanged for carbon monoxide (1 atm, balloon) and stirred for 0.3 h. After this time 3,4,5-trimethoxyiodobenzene **13b** (624 mg, 2.12 mmol) was added and the solution heated to 80 oC (external temperature) for 16 h. The reaction mixture was cooled to 18 oC diluted with ethyl acetate (100 mL) and washed with water (2 x 80 mL) and brine (3 x 80 mL), dried over MgSO4 and concentrated onto silica-gel (3 g) under reduced pressure. The solid residue was subjected to flash chromatography (silica-gel, eluted sequentially with hexane / CH2Cl2 2:1, 1:1, 1:2). The relevant fractions (R*f* = 0.23, hexane / diethyl ether 2:1) were concentrated giving the product as a white solid (572 mg, 64%), mp = 108-9 oC. 1H NMR (300 MHz, CDCl3)  7.56 (d, *J* = 9.0 Hz, 2H), 7.53 (d, *J* = 8.7 Hz, 1H), 7.13 (s, 2H), 7.09 (d, *J* = 2.4 Hz, 1H), 6.92 (dd, *J* = 2.4 Hz, 8.7 Hz, 1H), 6.82 (d, *J* = 9.0 Hz, 2H), 3.89 (s, 3H), 3.87 (s, 3H), 3.79 (s, 3H), 3.70 (s, 6H). 13C NMR + APT (75 MHz, CDCl3)  190.4 (C), 160.2 (C), 158.2 (C), 156.9 (C), 154.4 (C), 152.5 (C), 142.0 (C), 132.3 (C), 129.5 (CH), 122.0 (C), 121.5 (C), 121.4 (CH), 114.2 (C), 113.5 (CH), 112.3 (CH), 107.0 (CH), 95.2 (CH), 60.6 (CH3), 55.7 (2x CH3), 55.3 (CH3), 54.9 (CH3). IR (KBr disc, cm-1): 2935, 2833, 1647, 1609, 1584, 1494, 1455, 1438, 1409, 1368, 1304, 1254. MS (70 eV) *m/z* (%): 448 (, 100), 433 (CH3, 15). HRMS calcd for C26H24O7: 448.1522. Found: 448.1520.

**(*E,Z*)-3-[(*E*)-1-(benzo[1,3]dioxol-5-yl)-3-phenylpropenylidene]-4,6-dimethoxy-3*H*-benzofuran-2-one (16):**

Methylmagnesium chloride (0.96 mL, 1.6 M in THF, 1.5 mmol) was added dropwise by syringe to a solution of 3,5-dimethoxy-2-iodophenol **10c** (200 mg, 0.714 mmol) and 5-ethynylbenzo[1,3]dioxole **4b** (125 mg, 0.855 mmol) in dry THF (3 mL) at 0 C. After warming to room temperature, Pd(PPh3)2Cl2 (15 mg, 3 mol%) was added and the reaction heated to 65 C and monitored by TLC. After 2.5 h consumption of **10c** was complete (R*f* = 0.37, 40% ether in hexane) and the THF was evaporated under reduced pressure and DMSO (5 mL) added. -(*E*)-Iodostyrene **13b** (197 mg, 0.856 mmol) was then added and a carbon monoxide balloon fitted to the reaction vessel after which the reaction was heated to 95 C and stirred for 3 h. TLC analysis revealed complete consumption of the tolan intermediate **12** (Rf = 0.31, 40% ether in hexane) and the reaction was extracted with CH2Cl2 (50 mL)and washed with 10% NH4Cl(aq) (50 mL) and water (50 mL). The organic layer was dried over MgSO4 and the crude solution was evaporated onto silica-gel (1.5 g). The solid residue was subjected to flash chromatography (silica-gel, eluted sequentially with hexane / CH2Cl2 2:1, 1:1 and CH­2Cl2). Evaporation of fractions containing the two *E/Z*-isomers of **16** (Rf = 0.70 and 0.45, CH2Cl2) gave an orange solid (141 mg, 46%). This material was recrystallised (hexane / CH­2Cl2) to give a pure sample of the *E*-isomer mp = 224-6 C.* 1H-NMR (*E*-isomer, CDCl3)  8.80 (d, *J =* 16.0 Hz, 1H), 7.55 (d, *J* = 7.4 Hz, 2H), 7.29 – 7.38 (m, 3H), 6.86 (d, *J =* 8.1 Hz, 1H), 6.81 (s, 1H), 6.77 (d, *J =* 8.1 Hz, 1H), 6.65 (d, *J =* 16.0 Hz, 1H), 6.33 (d, *J =* 1.9 Hz, 1H), 6.05 (s, 2H), 5.98 (d, *J* = 1.9 Hz, 1H), 3.82 (s, 3H), 3.24 (s, 3H). A 1H-NMR of the pure *Z*-isomer was not obtained however several distinctive peaks were discernible by elimination of resonances associated with the *E*-isomer in the spectrum containing both isomers.  8.37 (d, *J =* 15.8 Hz, 1H), 6.51 (d, *J =* 15.8 Hz, 1H), 6.07 (s, 2H), 3.93 (s, 3H), 3.87 (s, 3H).

A 13C nmr of the pure *E*-isomer was attempted however the spectrum did contain some peaks from the *Z*-isomer due to partial isomerisation during the course of the acquisition period. 13C-NMR (expected to belong to the *E*-isomer) (CDCl3)  168.9 (C), 162.4 (C), 155.2 (2 x C), 150.3 (C), 147.4 (C), 146.9 (C), 141.3 (CH), 136.9 (C), 134.3 (C), 129.1 (CH), 128.8 (CH), 128.5 (CH), 127.9 (CH), 124.1 (CH), 117.5 (C), 110.8 (CH), 107.4 (CH), 106.1 (C), 101.1 (CH2), 93.9 (CH), 89.0 (CH), 55.8 (CH3), 55.6 (CH3). IR (both isomers, NaCl film, cm-1): 1762, 1625, 1580, 1502, 1485, 1467, 1434, 1335, 1214, 1152, 1079, 1040. MS (both isomers) *m/z* (%): 428 (M+, 100), 400 (M+ - CO, 30), 235 (59), 193 (27). HRMS calcd forC26H20O6: 428.1260. Found: 428.1257

A small quantity of a minor product from the reaction was also obtained and identified as 3,4,5-trimethoxybenzoic acid 2-(benzo[1,3]dioxo-5-ylethynyl)-3,5-dimethoxyphenyl ester (yield not determined):

1H-NMR (CDCl3)  7.96 (d, *J =* 15.3 Hz, 1H, C=CH), 7.58 (m, 2H, 2x PhH), 7.43 (m, 3H, 3x PhH), 6.96 (dd, *J =* 8.1 Hz and 1.4 Hz, 1H, Ar-H), 6.88 (d, *J* = 1.4 Hz, 1H, Ar-H), 6.69 (d, *J =* 15.3 Hz, 1H, C=CH), 6.63 (d, *J =* 8.1 Hz, 1H, Ar-H), 6.42, (d, *J =* 2.2 Hz, 1H, Ar-H), 6.38 (d, *J =* 2.2 Hz, 1H, Ar-H), 5.92 (s, 2H, CH2), 3.92 (s, 3H, OCH3), 3.84 (s, 3H, OCH3). 13C-NMR (CDCl3)  164.7 (C=O), 161.5, 160.8, 153.8, 147.6, 147.3 (C-O), 147.0 (CH), 134.2 (C), 130.8 (CH), 129.0 (2 x CH), 128.4 (2 x CH), 126.1 (CH), 117.0 (CH), 116.9 (C), 111.5, 108.3 (CH), 101.2 (CH2), 100.1 (C), 99.8 (CH), 96.9 (C), 96.4 (CH), 79.3 (C), 56.2, 55.7 (OCH3). MS *m/z* (%): 428 (M+, 77), 298 (M+, 100), 283 (58), 131 (83), 103 (57).

**6-Methoxy-2-(4-methoxyphenyl)-3-(3,4,5-trimethoxyphenyl)indole (14h):**

Methylmagnesium chloride (1.37 mL, 3.0 M in THF, 4.11 mmol) was added dropwise to a solution of 2-iodo-5-methoxyacetanilide **11a** (580 mg, 2.00 mmol) and 4-methoxyphenylacetylene **4c** (277 mg, 2.1 mmol) in dry THF (5.0 mL) at 0 oC. The reaction mixture was then warmed to 18 oC, Pd(PPh3)2Cl2 (42 mg, 0.060 mmol) added and the reaction mixture heated to 65 oC for 0.5 h, after which time the reaction was shown to be complete by TLC. The solution was cooled to 18 oC, diluted with DMSO (8.0 mL) and 3,4,5-trimethoxyiodobenzene **13c** (617 mg, 2.1 mmol) added. The solution was heated to 80 oC, (external temperature) under a slight flow of N2 (g) for 1 h (to remove THF) and heating continued under a stationary atmosphere of N2 (g)for a further 10 h. The reaction mixture was cooled to 18 oC diluted with ethyl acetate (150 mL) and washed with water (2 x 100 mL) and brine (3 x 100 mL), dried over MgSO4 and concentrated onto silica-gel (5 g) under reduced pressure. The solid residue was subjected to flash chromatography (silica-gel, eluted sequentially with hexane / CH2Cl2 / diethyl ether 2:1:1 and 1:1:1). The relevant fractions (R*f* = 0.33, CH2Cl2) were concentrated giving the product **14h** as a white solid (712 mg, 85%) mp = 191-2 oC. 1H NMR (300 MHz, CDCl3)  8.19 (br s, 1H), 7.60 (d, *J* = 8.7 Hz, 1H), 7.36 (d, *J* = 8.4 Hz, 2H), 6.91-6.82 (m, 4H), 6.65 (s, 2H), 3.92 (s, 3H), 3.87 (s, 3H), 3.82 (s, 3H), 3.74 (s, 6H). 13C NMR + APT (75 MHz, CDCl3)  158.9 (C), 156.6 (C), 153.1 (C), 136.4 (C), 136.2 (C), 132.8 (C), 130.9 (C), 129.2 (CH), 125.2 (C), 123.0 (C), 120.0 (CH), 113.9 (CH), 113.8 (C), 110.1 (CH), 106.8 (CH), 94.4 (CH), 60.9 (CH3), 55.9 (2 x CH3), 55.7 (CH3), 55.3 (CH3). IR (KBr disc, cm-1) 3368, 2999, 2933, 2831,1574, 1514, 1405, 1332, 1260, 1180, 1128. MS (70 eV) *m/z* (%): 419 (, 100), 404 (CH3, 20). HRMS calcd for C25H25NO5: 419.1733. Found: 419.1738.

* The stereochemistry of this isomer was determined by X-ray crystallography. The details of this crystal structure analysis will be reported elsewhere.
